# Supplementary material for: Visualizing nanostructures in supramolecular hydrogels: a correlative study using confocal and cryogenic scanning electron microscopy
Source: publisher site journal article supplement (doi:10.3762/bjnano.16.156), 2025-12-12
Supplement: Additional file 1 [file 2190-4286-16-156-S1.pdf]

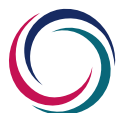

## Supporting Information

for

### **Visualizing nanostructures in supramolecular hydrogels: a correlative study using confocal and cryogenic scanning electron microscopy**

Shaun M. Smith, Ferdinando Malagrecà, Jacqueline Hicks, Giuseppe Mantovani,  
David B. Amabilino, Christopher Parmenter and Lluïsa Pérez-García

*Beilstein J. Nanotechnol.* **2025**, *16*, 2274–2284. doi:10.3762/bjnano.16.156

## Additional figures and tables

# Table of Contents

1. Supplementary Figures
2. Supplementary Table

## 1. Supplementary Figures

Figure S1

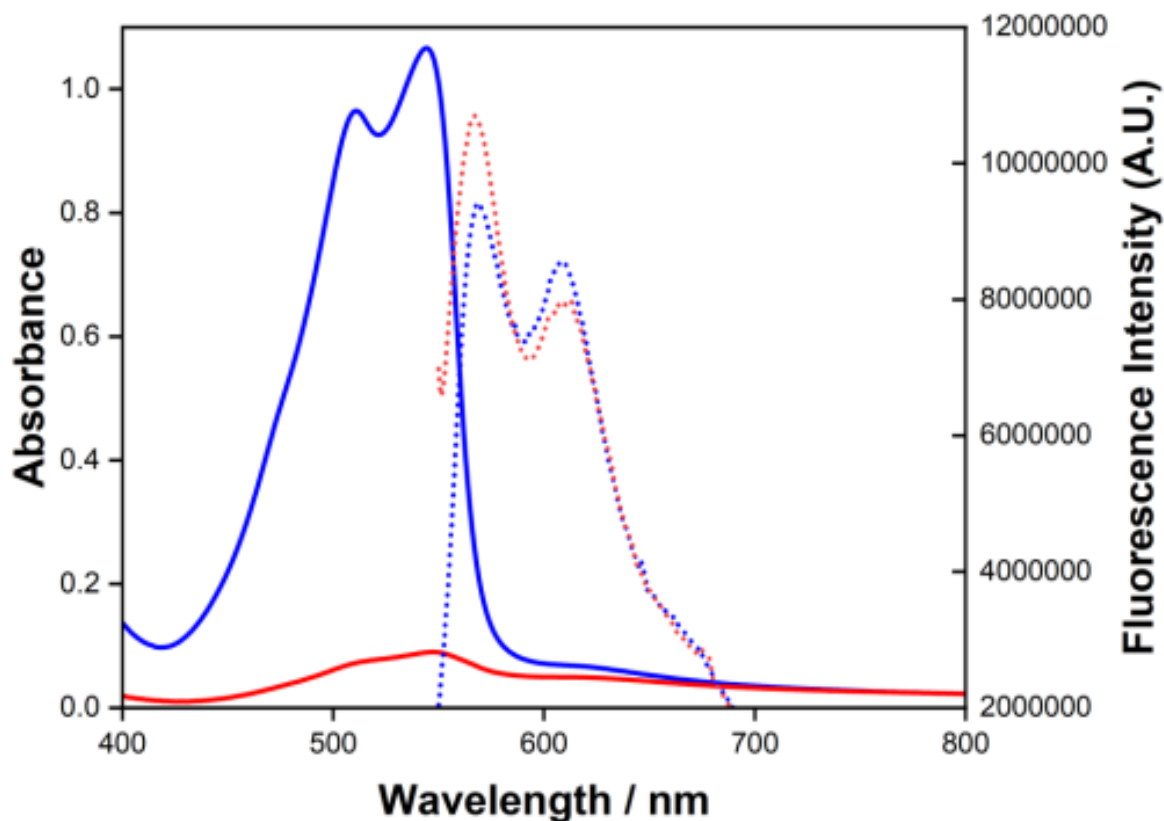

**Figure S1:** Plot displaying the absorption spectrum of DPP-BC in 1:1 water-ethanol solution, [DPP-BC] = 100  $\mu$ M (blue solid line), absorption spectrum of DPP-BC@Gel, [DPP-BC] = 200  $\mu$ M (red solid line), fluorescence emission spectrum of DPP-BC in 1:1 water-ethanol, [DPP-BC] = 100  $\mu$ M (blue dotted line), and fluorescence emission spectrum of DPP-BC@Gel, [DPP-BC] = 200  $\mu$ M (red dotted line).  $\lambda_{exc}$  = 530 nm for both fluorescence emission measurements.

**Figure S2**

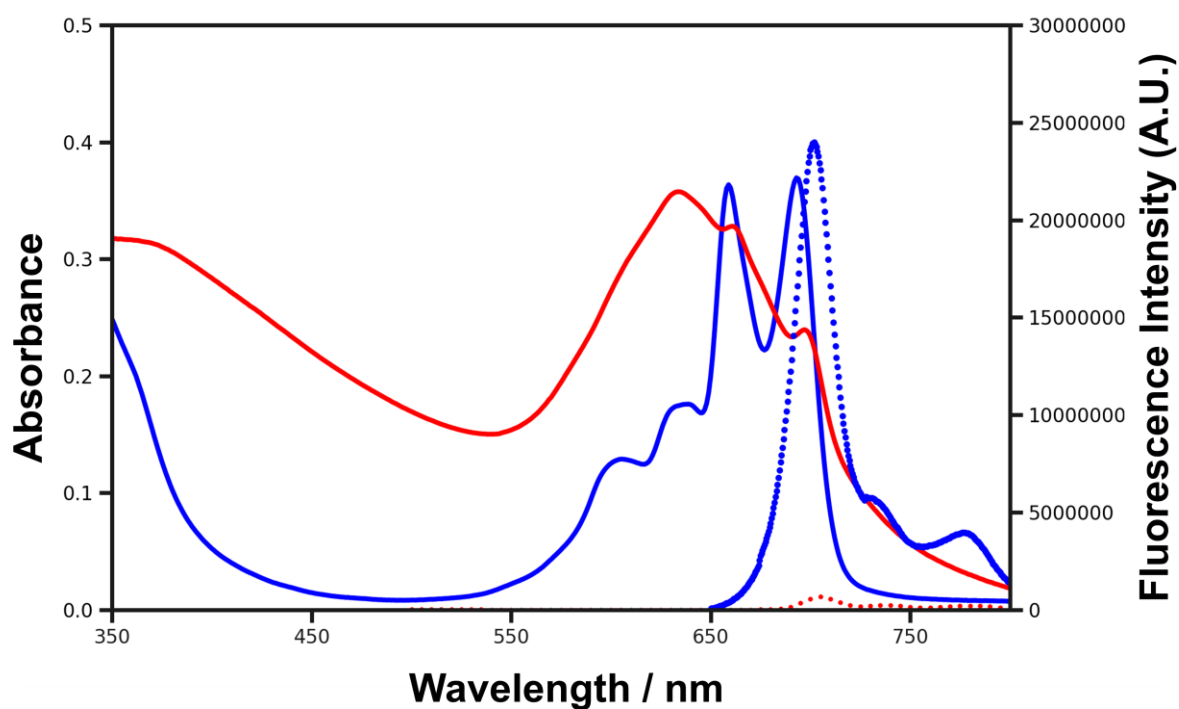

**Figure S2:** Plot displaying the absorption spectrum of ZnPc in 1:1 water-ethanol solution, [ZnPc] = 10  $\mu$ M (blue solid line), absorption spectrum of ZnPc@Gel, [ZnPc] = 200  $\mu$ M (red solid line), fluorescence emission spectrum of ZnPc in 1:1 water-ethanol, [ZnPc] = 20  $\mu$ M (blue dotted line), and fluorescence emission spectrum of ZnPc@Gel, [ZnPc] = 100  $\mu$ M (red dotted line).  $\lambda_{\text{exc}}$  = 625 nm for both fluorescence emission measurements.

## 2. Supplementary Table

**Table S1:** Experimentally determined quantum yield of fluorescence values for ZnPc and DPP-BC in 1:1 water-ethanol solutions.

| Compound                                         | $\Phi_F$ |
|--------------------------------------------------|----------|
| Zinc phthalocyanine tetrasulfonic acid<br>(ZnPc) | 0.07     |
| DPP-BC                                           | 0.84     |
